# Supplementary material for: Cu2−xS homojunction coatings empower titanium implants with near-infrared-triggered antibacterial and antifouling properties
Source: Royal Society of Chemistry journal article supplement (doi:10.1039/d4tb00235k), 2024-01-01
Supplement: d4tb00235k1.pdf [file d4tb00235k1.pdf]

## **Cu<sub>2-x</sub>S Homojunction Coatings Empower Titanium Implant with Near Infrared-Triggered Antibacterial and Antifouling Properties**

Fengqian Wang<sup>1</sup>, Weicong Peng<sup>1</sup>, Dongliang Huo<sup>1</sup>, Jingxian Zhang<sup>1</sup>, Suiping Deng<sup>1</sup>, Langhuan Huang<sup>1,2</sup>, Shaozao Tan<sup>1,2,\*</sup>

<sup>1</sup> Guangdong Engineering & Technology Research Centre of Graphene-like Materials and Products, Department of Chemistry, College of Chemistry and Materials Science, Jinan University, Guangzhou 510632, P. R. China

<sup>2</sup> Guangdong Jianpai New Materials Co., Ltd., Foshan 528500, P. R. China

\* Corresponding authors: [orcid.org/0000-0002-4669-0401](https://orcid.org/0000-0002-4669-0401); E-mail addresses: [tsztan@jnu.edu.cn](mailto:tsztan@jnu.edu.cn) (S. Tan).

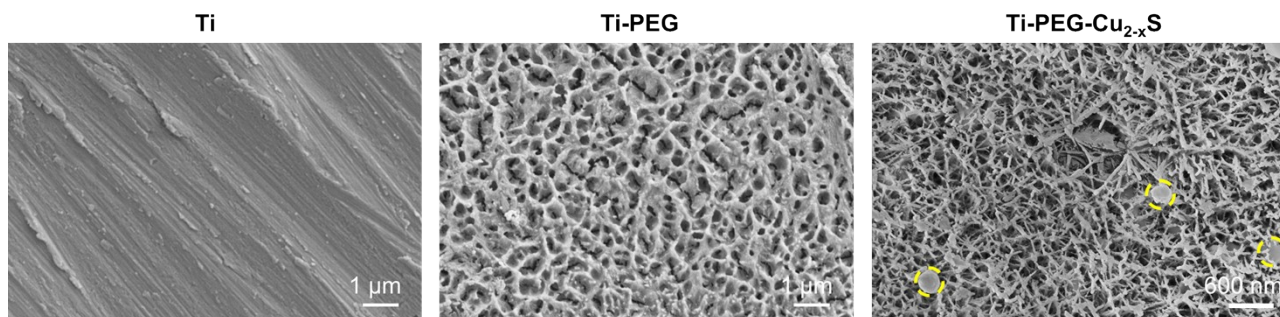

Figure S1. SEM images of Ti, Ti-PEG and Ti-PEG-Cu<sub>2-x</sub>S.

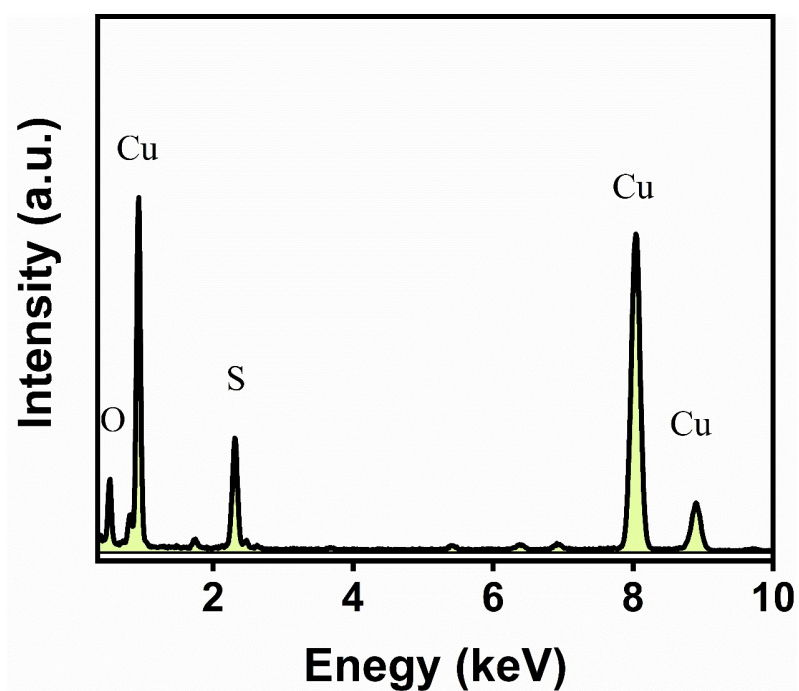

Figure S2. EDS image of the Cu<sub>2-x</sub>S.

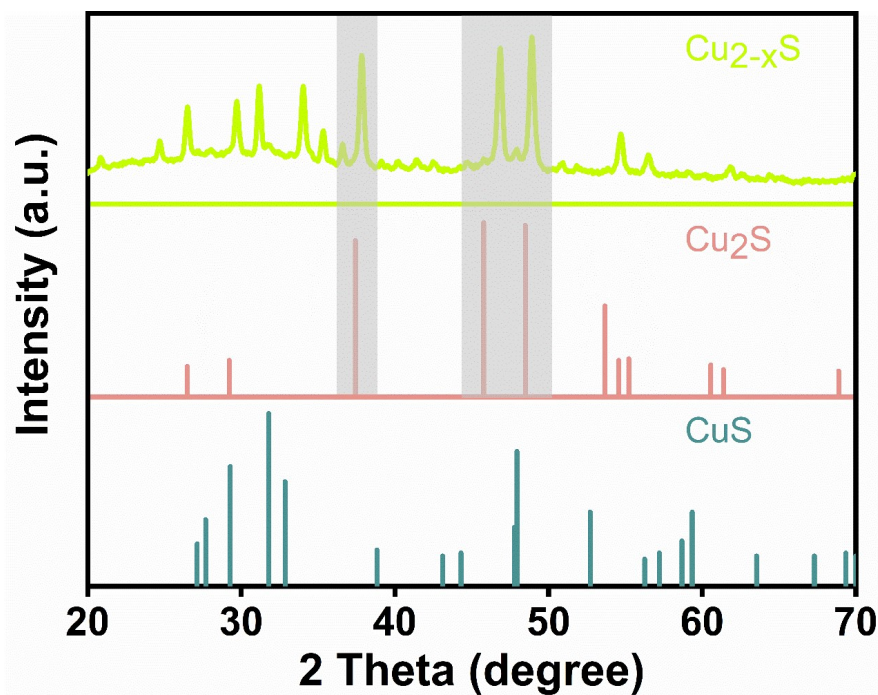

Figure S3. XRD patterns of the  $\text{Cu}_{2-x}\text{S}$ .

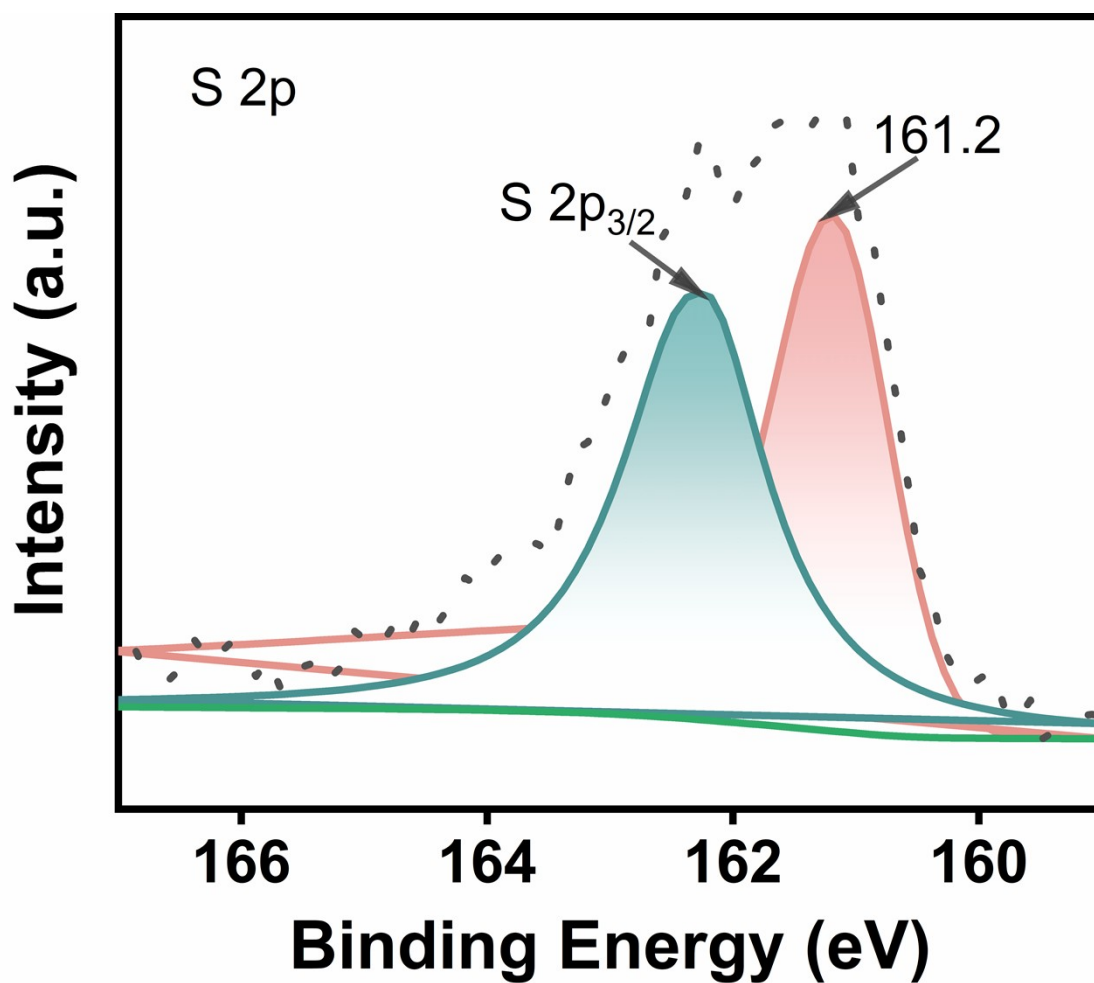

Figure S4. S 2p spectrum of  $\text{Cu}_{2-x}\text{S}$ .

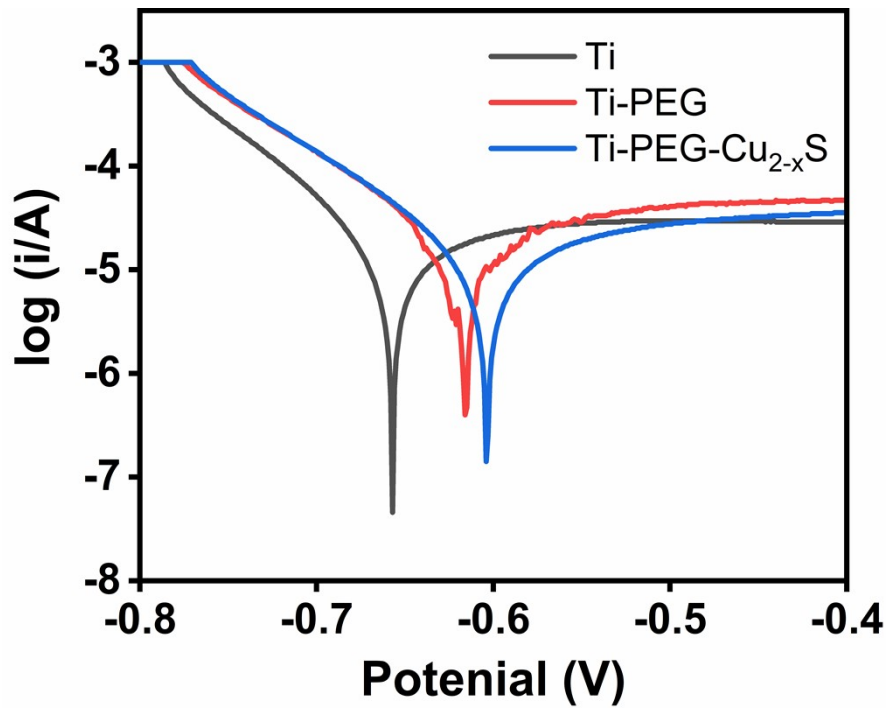

Figure S5. Potential-dynamic polarization curves of Ti, Ti-PEG and Ti-PEG-Cu<sub>2-x</sub>S.

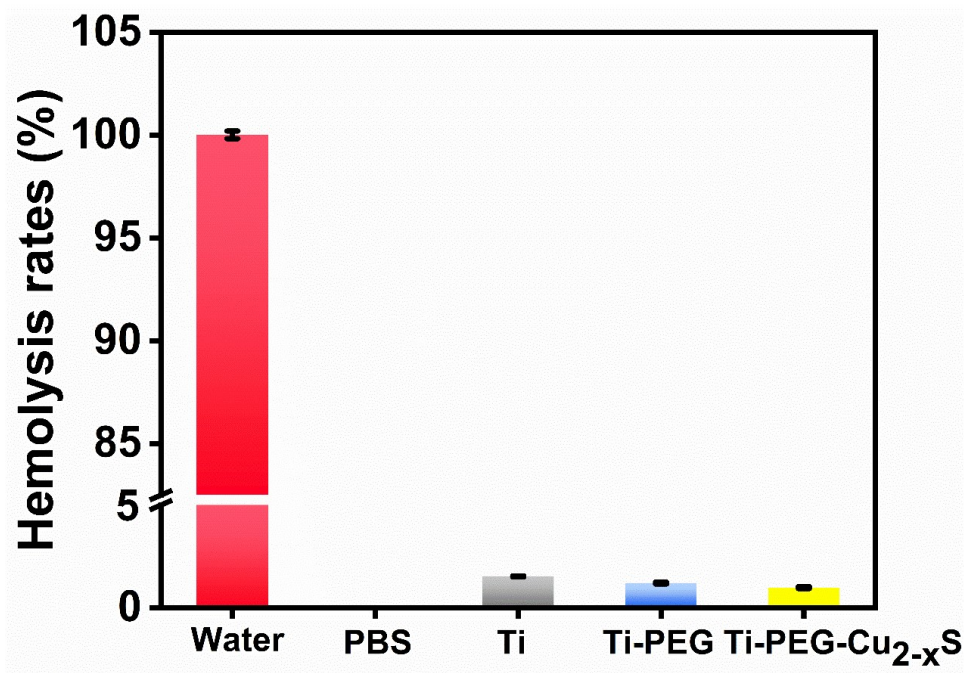

Figure S6. The hemolytic rate of different samples.
